# Supplementary material for: Bias in Ligation-Based Small RNA Sequencing Library Construction Is Determined by Adaptor and RNA Structure
Source: PLoS One. 2015 May 5;10(5):e0126049. doi: 10.1371/journal.pone.0126049 (PMC4420488; doi:10.1371/journal.pone.0126049)
Supplement: S4 Table — The 3’ A1 adaptor sequence was added to the 3’ end of the miRNA sequence prior to cofolding with the 5’ adaptor. The adaptor sequences can be found in S1 Table. (XLSX) [file pone.0126049.s009.xlsx]

## Sheet: S4
RNA	Sequence	5'-Cofold with A1	5'-Cofold Category with A1	5'-Cofold with designed adaptor	5'-Cofold Category with designed adaptor	5'-Cofold with C3 adaptor	5'-Cofold Category with C3 adaptor
MIR-29B	UAGCACCAUUUGAAAUCAGUGUU	.............(((...((((...&......(((.((((((....)))))).))).))))..)))....	8	...((((((..(((((..((((((((&...........))))))))..))..))).)).....))))....	9	.....((((.....((...(((((((&.(((((....((....))))))))))))))....))...)))).	12
MIR-519E	AAGUGCCUCCUUUUAGAGUGUU	...(((((....((.((...((((..&....(((((......))).)).))))..)).)).)))))....	8	...(((((....(((.((.(((((((&....)))))))....)).)))..((.....))..)))))....	9	.....((((.....((...(((((((&....(((((......))).)).)))))))....))...)))).	12
MIR-595	GAAGUGUGCCGUGGUGUGUCU	.............(((...((((...&(((((((((....))))).))))......))))..)))....	16	...(((((....(((..(((((((((&.....)))))))))..)))...((.....))..)))))....	9	...(((((...........(((((..&...)))))....((((((......))))))...)))))....	5
MIR-674	GCACUGAGAUGGGAGUGGUGUA	.....(((((((.((((.........&..))))))).((((((((((((...))))))).))))))))).	5	...(((((..........((((((((&.....))))))))...((((((...))))))...)))))....	9	.....(((((((.((((.........&..))))))).((((((((((((...))))))).))))))))).	5
