# Supplementary material for: Bias in Ligation-Based Small RNA Sequencing Library Construction Is Determined by Adaptor and RNA Structure
Source: PLoS One. 2015 May 5;10(5):e0126049. doi: 10.1371/journal.pone.0126049 (PMC4420488; doi:10.1371/journal.pone.0126049)
Supplement: S6 Table — Each mix contained all 50 of the sequences indicated at the concentrations shown. HTS results were generated by the IonPGM after library construction with the indicated adapters. (XLSX) [file pone.0126049.s011.xlsx]

## Sheet: S6
RNA	Sequence	pmol/µl in equivalent mix	A1 adaptors raw reads (equivalent mix)	A1 adaptors Normalized reads (equivalent mix)	A1 adaptors Normalized reads / expected value (equivalent mix)	IT MidRand adaptors raw reads (equivalent mix)	IT MidRand adaptors Normalized reads (equivalent mix)	IT MidRand adaptors Normalized reads / expected value (equivalent mix)	pmol/µl in mix 1	A1 adaptors raw reads (mix 1)	A1 adaptors Normalized reads (mix 1)	A1 adaptors Normalized reads / expected value (mix 1)	IT MidRand adaptors raw reads (mix 1)	IT MidRand adaptors Normalized reads (mix 1)	IT MidRand adaptors Normalized reads / expected value (mix 1)	pmol/µl in mix 2	A1 adaptors raw reads (mix 2)	A1 adaptors Normalized reads (mix 2)	A1 adaptors Normalized reads / expected value (mix 2)	IT MidRand adaptors raw reads (mix 2)	IT MidRand adaptors Normalized reads (mix 2)	IT MidRand adaptors Normalized reads / expected value (mix 2)
miR-611	GCGAGGACCCCTCGGGGTCTGAC	0.1	937	0.00283249	0.0283249	2936	0.0107088	0.107088	0.0156	2	7.53273e-05	0.00482867	16	0.000471301	0.0302116	0.00098	2	3.0706e-05	0.0313327	1	2.67816e-05	0.0273282
miR-1614	GGCATGGCAGACTCACCCTGC	0.1	387	0.00116987	0.0116987	2573	0.00938482	0.0938482	0.0039	2	7.53273e-05	0.0193147	10	0.000294563	0.075529	0.25	34	0.000522002	0.00208801	806	0.021586	0.086344
miR-2419	ATCGCATCAACACTCGTCTGTT	0.1	7357	0.0222397	0.222397	8501	0.0310067	0.310067	0.00098	4	0.000150655	0.153729	7	0.000206194	0.210402	0.125	513	0.0078761	0.0630088	500	0.0133908	0.107127
miR-30a-5p	TGTAAACATCCTCGACTGGAAG	0.1	19321	0.058406	0.58406	4922	0.0179526	0.179526	0.0039	122	0.00459497	1.1782	19	0.00055967	0.143505	0.25	1141	0.0175178	0.0700711	1182	0.0316559	0.126624
miR-219-5P	TGATTGTCCAAACGCAATTCT	0.1	1617	0.00488808	0.0488808	5434	0.0198201	0.198201	0.0039	9	0.000338973	0.0869161	21	0.000618582	0.158611	0.25	43	0.00066018	0.00264072	1210	0.0324058	0.129623
miR-338-3p	TCCAGCATCAGTGATTTTGTTG	0.1	126	0.000380889	0.00380889	5643	0.0205824	0.205824	0.5	42	0.00158187	0.00316375	3790	0.111639	0.223279	0.0156	0	0	0	95	0.00254426	0.163093
miR-M10-3p	TCGAAATCTCTACGAGATAACA	0.1	313	0.000946177	0.00946177	5137	0.0187368	0.187368	0.0156	8	0.000301309	0.0193147	135	0.0039766	0.25491	0.00098	0	0	0	6	0.00016069	0.163969
miR-21	TAGCTTATCAGACTGATGTTGA	0.1	21598	0.0652893	0.652893	18814	0.0686226	0.686226	0.0156	94	0.00354038	0.226948	433	0.0127546	0.817601	0.00098	1	1.5353e-05	0.0156663	6	0.00016069	0.163969
miR-653	GTGTTGAAACAATCTCTGTTG	0.1	2642	0.00798658	0.0798658	8109	0.029577	0.29577	0.0625	355	0.0133706	0.21393	1187	0.0349646	0.559434	0.03125	20	0.00030706	0.00982593	199	0.00532955	0.170546
miR-567	AGTATGTTCTTCCAGGACAGAAC	0.1	13157	0.0397727	0.397727	4047	0.0147611	0.147611	0.00195	20	0.000753273	0.386294	10	0.000294563	0.151058	0.0625	514	0.00789145	0.126263	403	0.010793	0.172688
miR-744-5p	TGCGGGGCTAGGGCTAACAGCA	0.1	40264	0.121715	1.21715	4140	0.0151003	0.151003	0.125	3754	0.141389	1.13111	645	0.0189993	0.151994	0.00195	38	0.000583414	0.299187	13	0.000348161	0.178544
miR-101a	TACAGTACTGTGATAACTGAA	0.1	8597	0.0259881	0.259881	8754	0.0319295	0.319295	0.03125	386	0.0145382	0.465221	518	0.0152584	0.488268	0.0078	30	0.00046059	0.05905	64	0.00171403	0.219747
miR-19b	TGTGCAAATCCATGCAAAACTGA	0.1	505	0.00152658	0.0152658	6028	0.0219867	0.219867	0.0156	2	7.53273e-05	0.00482867	140	0.00412388	0.264351	0.00098	0	0	0	10	0.000267816	0.273282
miR-208A-3P	ATAAGACGAGCAAAAAGCTTGT	0.1	816	0.00246671	0.0246671	7201	0.0262651	0.262651	0.0625	52	0.00195851	0.0313362	556	0.0163777	0.262043	0.03125	18	0.000276354	0.00884333	321	0.00859691	0.275101
miR-712	CTCCTTCACCCGGGCGGTACC	0.1	3202	0.00967942	0.0967942	15491	0.0565022	0.565022	0.0039	1	3.76636e-05	0.00965735	122	0.00359367	0.921453	0.25	469	0.00720056	0.0288023	2773	0.0742655	0.297062
miR-15a-5p	TAGCAGCACATAATGGTTTGTG	0.1	1254	0.00379076	0.0379076	9033	0.0329472	0.329472	0.00195	2	7.53273e-05	0.0386294	20	0.000589126	0.302116	0.0625	47	0.000721592	0.0115455	744	0.0199255	0.318809
miR-1868	TCACGGAAAACGAGGGAGCAGCCA	0.1	33122	0.100126	1.00126	9794	0.0357229	0.357229	0.0078	12	0.000451964	0.0579441	123	0.00362312	0.464503	0.5	7232	0.111033	0.222066	6324	0.169367	0.338734
let-7	TGAGGTAGTAGGTTGTATAGTT	0.1	95443	0.288518	2.88518	9667	0.0352596	0.352596	0.00195	225	0.00847432	4.34581	17	0.000500757	0.256798	0.0625	2666	0.0409311	0.654898	822	0.0220145	0.352232
miR-2777	AGGGACCTTGCCTGGGTTAT	0.1	289	0.000873627	0.00873627	18958	0.0691478	0.691478	0.00195	0	0	0	42	0.00123716	0.634443	0.0625	5	7.67651e-05	0.00122824	1057	0.0283082	0.452931
miR-519e	AAGTGCCTCCTTTTAGAGTGTT	0.1	22	6.65045e-05	0.000665045	21765	0.0793862	0.793862	0.25	3	0.000112991	0.000451964	5406	0.159241	0.636963	0.0039	0	0	0	68	0.00182115	0.466962
miR-652	AATGGCGCCACTAGGGTTGTG	0.1	5916	0.0178837	0.178837	23973	0.0874397	0.874397	0.0625	547	0.020602	0.329632	2473	0.0728454	1.16553	0.03125	12	0.000184236	0.00589556	585	0.0156673	0.501352
miR-126-3p	TCGTACCGTGAGTAATAATGCG	0.1	3304	0.00998776	0.0998776	14686	0.053566	0.53566	0.03125	1	3.76636e-05	0.00120524	262	0.00771755	0.246962	0.0078	14	0.000214942	0.0275567	164	0.00439219	0.563101
miR-5117	AGATTGATTGTTAAGCTGAAA	0.1	285738	0.863766	8.63766	8469	0.03089	0.3089	0.0078	2444	0.09205	11.8013	62	0.00182629	0.23414	0.5	103901	1.59519	3.19039	10657	0.285412	0.570824
miR-5183	TATTTGGACAAATTTGAGTCA	0.1	2367	0.00715528	0.0715528	15918	0.0580597	0.580597	0.0625	130	0.00489627	0.0783404	1291	0.0380281	0.608449	0.03125	51	0.000783004	0.0250561	692	0.0185329	0.593053
miR-5099	TTAGATCGATGTGGTGCTCC	0.1	54205	0.163858	1.63858	25907	0.0944938	0.944938	0.0156	33	0.0012429	0.0796731	555	0.0163482	1.04796	0.00098	14	0.000214942	0.219329	22	0.000589196	0.601221
miR-103b	AGCAGCATTGTACAGGGCTATGA	0.1	28996	0.0876529	0.876529	20400	0.0744074	0.744074	0.00098	64	0.00241047	2.45967	14	0.000412388	0.420804	0.125	254	0.00389966	0.0311973	2891	0.0774257	0.619406
miR-23a	ATCACATTGCCAGGGATTTCC	0.1	1184	0.00357915	0.0357915	14033	0.0511843	0.511843	0.25	87	0.00327674	0.0131069	3214	0.0946725	0.37869	0.0039	1	1.5353e-05	0.00393667	98	0.0026246	0.672975
miR-139-3p	TGGAGACGCGGCCCTGTTGGAG	0.1	8456	0.0255619	0.255619	22754	0.0829935	0.829935	0.25	1403	0.0528421	0.211368	5969	0.175825	0.703299	0.0039	6	9.21181e-05	0.02362	99	0.00265138	0.679842
miR-253	TTAGTAGGCGTTGTGGGAAGGG	0.1	10295	0.0311211	0.311211	32083	0.11702	1.1702	0.03125	2009	0.0756663	2.42132	1251	0.0368498	1.17919	0.0078	3	4.6059e-05	0.005905	205	0.00549024	0.703877
miR-3225	TACATATGACTGTTTATAACACT	0.1	189799	0.573749	5.73749	24246	0.0884354	0.884354	0.0078	1479	0.0557045	7.14161	264	0.00777646	0.996982	0.5	139161	2.13654	4.27308	13212	0.353839	0.707678
miR-1944	CTCTGTGCTGAATGTCAAGTTCTGATT	0.1	149249	0.451169	4.51169	21461	0.0782773	0.782773	0.03125	5461	0.205681	6.5818	809	0.0238301	0.762565	0.0078	1090	0.0167348	2.14548	220	0.00589196	0.75538
miR-495	AAACAAACATGGTGCACTTCTT	0.1	230	0.000695274	0.00695274	25210	0.0919515	0.919515	0.00098	0	0	0	33	0.000972058	0.991896	0.125	22	0.000337766	0.00270213	3943	0.1056	0.8448
miR-5097	GTTCATGTCCCTGTTCAGGCGCCA	0.1	1112	0.0033615	0.033615	23022	0.083971	0.83971	0.0078	5	0.000188318	0.0241434	447	0.013167	1.68807	0.5	467	0.00716986	0.0143397	16442	0.440344	0.880688
miR-122	TGGAGTGTGACAATGGTGTTTG	0.1	3978	0.0120252	0.120252	29946	0.109226	1.09226	0.5	19011	0.716024	1.43205	30497	0.898329	1.79666	0.0156	22	0.000337766	0.0216517	590	0.0158012	1.0129
miR-124	TAAGGCACGCGGTGAATGCC	0.1	10091	0.0305044	0.305044	23601	0.0860828	0.860828	0.00195	12	0.000451964	0.231776	61	0.00179683	0.921453	0.0625	268	0.00411461	0.0658337	2485	0.0665524	1.06484
miR-31	AGGCAAGATGCTGGCATAGCT	0.1	2372	0.00717039	0.0717039	27602	0.100676	1.00676	0.5	477	0.0179656	0.0359311	12786	0.376628	0.753256	0.0156	31	0.000475943	0.0305092	623	0.016685	1.06955
miR-452-5p	TGTTTGCAGAGGAAACTGAGAC	0.1	120344	0.363792	3.63792	31108	0.113464	1.13464	0.5	48447	1.82469	3.64938	19511	0.574722	1.14944	0.0156	988	0.0151688	0.972357	668	0.0178901	1.1468
miR-382	GAAGTTGTTCGTGGTGGATTCG	0.1	3673	0.0111032	0.111032	37087	0.135272	1.35272	0.125	342	0.012881	0.103048	5075	0.149491	1.19593	0.00195	2	3.0706e-05	0.0157467	96	0.00257104	1.31848
miR-126-5p	CATTATTACTTTTGGTACGCG	0.1	122	0.000368798	0.00368798	28636	0.104448	1.04448	0.25	25	0.000941591	0.00376636	9808	0.288907	1.15563	0.0039	0	0	0	215	0.00575805	1.47642
miR-1949	CTATACCAGGATGTCAGCATAGTT	0.1	19519	0.0590046	0.590046	40094	0.14624	1.4624	0.125	316	0.0119017	0.0952137	3115	0.0917564	0.734051	0.00195	25	0.000383825	0.196833	108	0.00289242	1.48329
miR-27a	TTCACAGTGGCTAAGTTCCGC	0.1	3600	0.0108826	0.108826	33137	0.120865	1.20865	0.5	383	0.0144252	0.0288504	15450	0.4551	0.9102	0.0156	122	0.00187307	0.120068	874	0.0234072	1.50046
miR-4803	TAACATAATAGTGTGGATTGA	0.1	2122	0.00641466	0.0641466	37417	0.136476	1.36476	0.00098	0	0	0	39	0.0011488	1.17224	0.125	192	0.00294778	0.0235822	7367	0.1973	1.5784
miR-1965	AAGCCGGGCCGTAGTGGCGCA	0.1	30027	0.0907695	0.907695	55640	0.202943	2.02943	0.125	2198	0.0827847	0.662278	7670	0.22593	1.80744	0.00195	41	0.000629473	0.322807	128	0.00342805	1.75797
miR-151-star	CTAGACTGAGGCTCCTTGAGG	0.1	213980	0.646847	6.46847	44388	0.161902	1.61902	0.25	40075	1.50937	6.03748	11875	0.349794	1.39917	0.0039	478	0.00733874	1.88173	285	0.00763277	1.95712
miR-11-3p	CATCACAGTCTGAGTTCTTGC	0.1	30751	0.0929581	0.929581	32876	0.119913	1.19913	0.0039	104	0.00391702	1.00436	206	0.006068	1.5559	0.25	10095	0.154989	0.619955	20707	0.554568	2.21827
miR-29b-2	TAGCACCATTTGAAATCAGTGTT	0.1	372	0.00112453	0.0112453	50380	0.183757	1.83757	0.125	24	0.000903928	0.00723142	7990	0.235356	1.88285	0.00195	0	0	0	168	0.00449932	2.30734
miR-127	TCGGATCCGTCTGAGCTTGGCT	0.1	44528	0.134605	1.34605	79682	0.290634	2.90634	0.0625	2092	0.0787924	1.26068	7155	0.21076	3.37216	0.03125	730	0.0112077	0.358646	3249	0.0870136	2.78443
miR-138-5p	AGCTGGTGTTGTGAATCAGGCCG	0.1	339	0.00102477	0.0102477	86571	0.315761	3.15761	0.00098	1	3.76636e-05	0.0384323	89	0.00262161	2.67511	0.125	13	0.000199589	0.00159671	13332	0.357053	2.85642
miR-27b-3p	TTCACAGTGGCTAAGTTCTGC	0.1	173825	0.525461	5.25461	90701	0.330825	3.30825	0.0078	462	0.0174006	2.23085	782	0.0230348	2.95318	0.5	54883	0.842619	1.68524	67722	1.81371	3.62741
miR-16	TAGCAGCACGTAAATATTGGCG	0.1	2561	0.00774173	0.0774173	192856	0.703427	7.03427	0.03125	27	0.00101692	0.0325414	7773	0.228964	7.32684	0.0078	10	0.00015353	0.0196833	2244	0.060098	7.70487
